# Supplementary material
Source: MDPI journal article supplement (https://www.mdpi.com/2071-1050/10/11/4079)
Supplement: s1 [file s1]

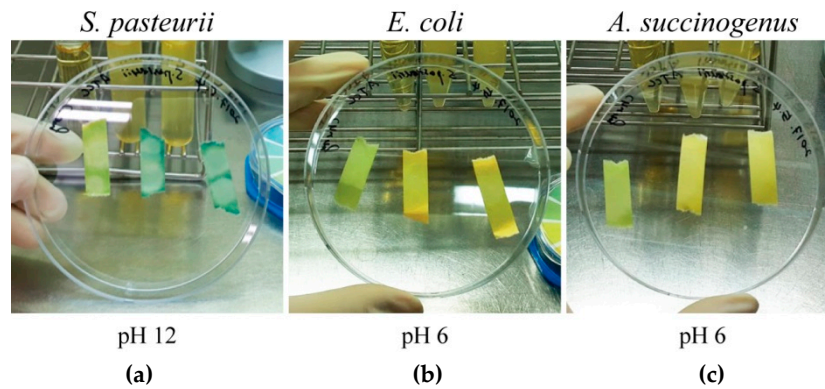

**Figure S1.** Urease test: The presence of urease activity of *S. pasteurii* was confirmed by pH change using litmus paper. After the addition of urea, the pH of *S. pasteurii* culture was pH 12 (a), *E. coli* culture pH 6 (b), and *A. succinogenus* culture pH 6 (c).

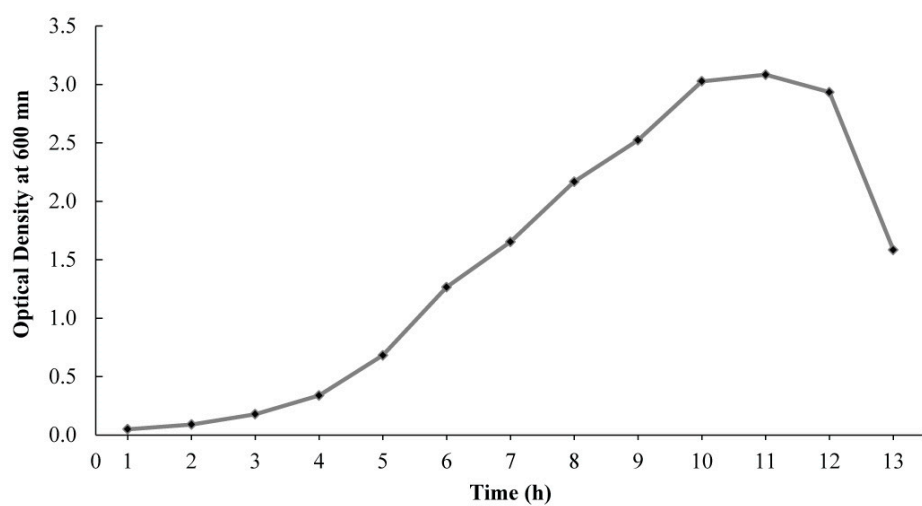

**Figure S2.** Growth curve of *S.pasteurii*.
